# Supplementary material for: Metabolic Alteration of Gut Microbiota Is Associated With Host Non-alcoholic Fatty Liver Disease Induced by Pyrethroid in Xenopus Laevis
Source: Research Square preprint supplement (doi:10.21203/rs.3.rs-484978/v1), 2021-05-10
Supplement: Supplementary file 1 [file 4c2fe7dd5d60a00cc30bdf08.docx]

**Additional file 1: Supplementary Figures and Tables.**

**Figure S1.** *Cis*-BF-induced the changes in metabolic profiles of the intestinal contents.

**Figure S2**. Differential expressed genes in *Xenopus laevis* liver after exposure to *cis*-BF. **Figure S3**. Hepatic gene expression profile in *Xenopus laevis* after exposure to 0.06 μg/L *cis*-BF. **Table S1.** The primers for RT-PCR assay. **Table S2.** *Cis*-BF concentrations in exposure solutions at 0 and 24 hours. **Table S3.** Identified significantly changed metabolites in gut samples. **Table S4.** Enriched KEGG pathways after exposure to *cis*-BF. **Table S5.** Enrichment ratio of pathways by KEGG analysis in 0.06 and 0.3 μg/L *cis*-BF exposure groups. **Table S6.** The results of gene transcription levels.
